# Supplementary material
Source: ML conference proceedings conference paper supplement (https://openreview.net/forum?id=96GMFXsbJE)
Supplement: supplementary_material [file attachment]

# DENOISING TASK DIFFICULTY-BASED CURRICULUM FOR TRAINING DIFFUSION MODELS

**Anonymous authors**

Paper under double-blind review

## A EXTENDED RELATED WORK

### A.1 ANALYZING DIFFUSION MODEL BEHAVIORS IN EACH TIMESTEP

In this section, we review works related to analyzing diffusion model behaviors in each timestep but not covered in detail in Section 2.1. Deja *et al.* (Deja *et al.*, 2022) explore denoising during the backward diffusion process and observe that transition from denoising to generation exists in the backward process. Go *et al.* (Go *et al.*, 2023) investigate the affinity between denoising tasks, showing that temporal proximal denoising tasks exhibit higher task affinity. Then, they also observe that simultaneously learning all denoising tasks by one model suffers from negative transfer. They can achieve better performance than standard diffusion training by alleviating negative transfer. Lee *et al.* (Lee *et al.*, 2023) analyze frequency characteristics according to timesteps and observe that high-frequency components are lost as timesteps increase. From this observation, they propose a multi-architecture multi-experts diffusion model, which utilizes multiple denoiser models specialized in each timestep interval but utilizes a transformer-like model as the timestep increases. From observations that smaller and larger models produce similar latent noise, Pan *et al.* (Pan *et al.*, 2023) propose T-Stitch, which leverages a pre-trained smaller model at the beginning of the backward process to accelerate the sampling speed. Xu *et al.* (Xu *et al.*, 2023) investigate the average trace-of-covariance of training targets according to timesteps, showing that it peaks in the intermediate timesteps, causing unstable training targets. For more stable training targets, they utilize weighted conditional scores with a reference batch.

### A.2 EASY-TO-HARD TRAINING STRATEGY

Progressive distillation (Salimans & Ho, 2022) focuses on reducing the number of sampling steps by training the model to progressively skip more steps, while cascaded diffusion (Ho *et al.*, 2022) aims to improve sample quality by progressively increasing the image resolution during training. Both methods concentrate on altering the model’s behavior or structure to tackle specific challenges, such as efficiency or resolution enhancement. In contrast, our work identifies trends in task difficulty across timestep-wise denoising tasks and leverages these findings to propose an easy-to-hard training scheme. This training strategy directly addresses the order and structure of the learning process, optimizing task sequencing to enhance performance. This distinction emphasizes that our approach is fundamentally different from these methods, as it addresses a unique aspect of diffusion model training.

## B DETAILED EXPERIMENTAL SETUPS FOR OBSERVATION

In Section 4, we examined the difficulty of denoising tasks in terms of convergence with various models  $\{M\}_{i=1}^{20}$ , which are trained within specific timesteps  $[\frac{i-1}{20}T, \frac{i}{20}T]$  for DiT and SiT, and  $[\Phi^{-1}(\frac{i-1}{N}), \Phi^{-1}(\frac{i}{N})]$  for EDM where  $\Phi^{-1}$  is the inverse cumulative distribution function of the Gaussian distribution. For the DiT architecture, we employed the DiT-B/2, whereas for EDM, we used the DDPM++ architecture. Both DiT and EDM models were trained on the FFHQ dataset, with a batch size of 256, for approximately 20,000 iterations and 4,000 king iterations (equivalent to processing 1 million images), respectively. This training was conducted until both loss and performance converged. As illustrated in Fig. A, we additionally plotted the iterations of each timestep interval when their loss values start to oscillate. We measured this by counting the number of times the loss value increased

054 after the step reached 100. As shown in the results, losses of all timestep intervals are stabilized  
 055 within 20K iterations, while the lower timesteps reach this point more slowly. This also suggests that  
 056 the convergence speed of lower timesteps tends to exhibit a slower regime. To examine specifically at  
 057 the observation of convergence, we also analyzed the convergence speed on the ImageNet dataset.  
 058 As shown in Fig. B, we obtained similar results as on the FFHQ dataset. Configuration of training  
 059 optimizers and learning rates are the same as setups in Section 6.  
 060  
 061  
 062

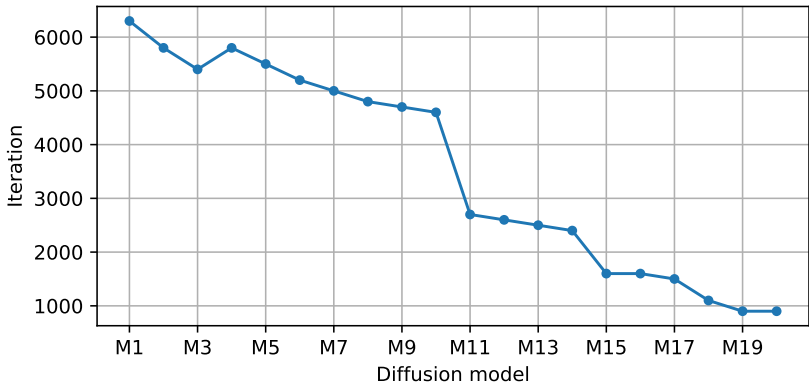

073  
 074 **Figure A:** Converged points are plotted during training for each diffusion model  $M_i$  in SiT.  
 075  
 076

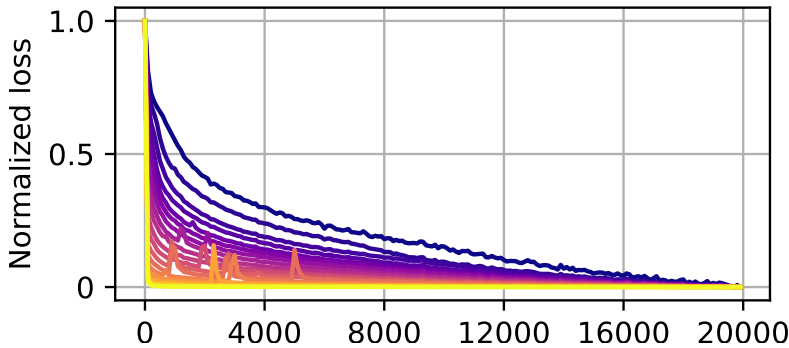

077  
 078  
 079  
 080  
 081  
 082  
 083  
 084  
 085  
 086  
 087  
 088  
 089  
 090  
 091 **Figure B:** Loss convergence plotted during training for each diffusion model  $M_i$  in DiT on ImageNet  
 092 dataset.  
 093

094  
 095 To evaluate the performance of diffusion models through the FID score of the generated images,  
 096 performing a recursive denoising task from  $T$  to zero is necessary, complicating the assessment using  
 097 only  $M_i$ . Following (Go et al., 2023), we generated samples where  $M_i$  was specifically utilized for  
 098 denoising within its trained intervals. At the same time, the diffusion model is responsible for the  
 099 denoising tasks across the entire range of timesteps. For this evaluation, we sampled 10K images  
 100 using a DDPM sampler over 250 steps for DiT and SiT, and an Euler solver over 40 steps for the  
 101 other models.  
 102

103  
 104 **C APPROXIMATION OF KL DIVERGENCE OF  $p_{t-1}$  AND  $p_t$ .**  
 105

106 Here, we supplement the approximation of KL Divergence of  $p_{t-1}$  and  $p_t$  omitted in Section 4.2. To  
 107 explore the difficulties of denoising tasks from the distributional viewpoint, we analyze the KL  
 divergence of  $p_{t-1}$  and  $p_t$ ,  $D_{KL}(p_{t-1}||p_t)$ . However, due to the unknown explicit density form of

$p_0$ , it is approximated through unbiased estimators as follows:

$$\hat{D}_{KL}(p_{t-1}||p_t) = \frac{1}{M} \sum_{\substack{i \in \{1, 2, \dots, M\} \\ \mathbf{x}_i \sim p_{t-1}}} \log \left( \frac{p_{t-1}(\mathbf{x}_i)}{p_t(\mathbf{x}_i)} \right), \quad (1)$$

$$\hat{p}_t(\mathbf{x}_t) = \frac{1}{L} \sum_{\substack{j \in \{1, 2, \dots, L\} \\ \mathbf{y}_j \sim p_0}} p_{0t}(\mathbf{x}_t | \mathbf{x}_0 = \mathbf{y}_j), \quad (2)$$

where  $\hat{D}_{KL}$  and  $\hat{p}_t$  are unbiased estimators of  $D_{KL}$  and  $p_t$ , respectively, and we choose Monte-Carlo estimators for them (Glasserman, 2004; McLeish, 2011).

We sampled 5,000 images to approximate the KL divergence, which is enough for Monte-Carlo sampling and might be no changes for larger samples. Despite the large amount of samples, the exploding appearance observed in Fig. 2 when  $t$  is close to zero is due to the characteristics of the data distribution. The image data distribution has narrow support (roughly speaking, it is non-zero only within a narrow range) (Ruderman & Bialek, 1993; Karras et al., 2024). As  $t$  increases, information about the original data distribution gradually diminishes with the modes in the distribution of  $x_t$  vanishing towards zero.

Given this, when  $t$  is close to zero (i.e. when the distribution of  $x_t$  is still analogous to the original data distribution), the narrow support and the tendency to move towards zero give rise to a region where  $p_{t-1}$  does not overlap with  $p_t$ . Consequently, when calculating the KL divergence  $D_{KL}(p_{t-1}||p_t) = E_{x \sim p_{t-1}}[\log(\frac{p_{t-1}(x)}{p_t(x)})]$ ,  $x_{t-1}$  potentially falls outside the support of  $p_t$ , which leads to  $p_t(x_{t-1}) = 0$  and numerical instability. On the other hand, as  $t$  increases, the accumulated noise broadens the support of  $x$ 's distribution, reducing the occurrence of zero values and stabilizing the numerical estimation.

## D ALGORITHM

Due to the limited space of the main manuscript, we hereby present the step-by-step process of our method to supplement the details of our approach. The pacing function, which determines the moments to transit between curriculum stages is described in Algorithm 1. By incorporating this pacing function, the detailed procedure of our proposed curriculum learning method for training diffusion is illustrated in Algorithm 2.

---

### Algorithm 1 Pacing Function

---

**Input:** Current loss  $L_{cur}$ , Best loss  $L_{best}$ , Current patience  $\tau_{cur}$ , Maximum patience  $\tau_{max}$ , Current curriculum index  $I_{cur}$

**Output:** Updated patience, Updated curriculum index

```
# Reset patience
if  $L_{cur} < L_{best}$  then
  return 0,  $I_{cur}$ 
else
  # Proceed to next curriculum
  if  $\tau_{cur} + 1 > \tau_{max}$  then
    return 0,  $I_{cur} - 1$ 
  # Increase patience
  else
    return  $p_{cur} + 1$ ,  $I_{cur}$ 
  end if
end if
```

---



---

### Algorithm 2 Curriculum Learning

---

**Input:** Curriculum  $\{C_i\}_{i=1}^N$ , Pacing function  $g$ , Maximum patience  $\tau_{max}$ , Loss function  $f$ , Curriculum index  $I_{cur} = N$ , Best loss  $L_{best} = \infty$ , Model  $M_\theta$

```
while  $I_{cur} > 0$  do
  # Mini-batch sampling
   $X \sim C_{I_{cur}}$ 
  # Calculate Loss
   $L_{cur} = f(M_\theta(X))$ 
  # Update model
   $\theta = \theta - \nabla_\theta L_{cur}$ 
  # Pacing function
   $\tau_{cur}, I_{next} = g(L_{cur}, L_{best}, \tau_{cur}, \tau_{max}, I_{cur})$ 
  # Update curriculum
  if  $I_{cur} \neq I_{next}$  then
     $I_{cur} = I_{next}$ 
     $L_{best} = \infty$ 
  # Update best loss
  else if  $L_{cur} < L_{best}$  then
     $L_{best} = L_{cur}$ 
  end if
end while
```

---

## E DETAILS ON EXPERIMENTAL SETUPS

**Evaluation metrics.** To evaluate the performance of models, we utilized three metrics: FID (Heusel et al., 2017), IS (Salimans et al., 2016), and Precision/Recall (Kynkäänniemi et al., 2019). Specifically, we applied FID and IS to measure sample quality, while Precision is used to assess quality further

and Recall was utilized to evaluate the diversity of the generated samples in ImageNet setup. In other datasets, we employed FID to evaluate sample quality. Unless otherwise mentioned, we sampled 50K samples for evaluation. In tasks involving conditional generation, including class-conditional image generation (e.g. CIFAR-10, ImageNet) and text-to-image conversion (e.g. MS-COCO), we adapted the classifier-free guidance (Ho & Salimans, 2022) with a guidance scale of 1.5.

**Training details.** For training diffusion models, we utilized the AdamW optimizer (Loshchilov & Hutter, 2017) with a constant learning rate of 0.0001, and weight decay was not applied. The exponential moving average (EMA) to the model’s weights was used to stabilize the training and the decay ratio was set to 0.9999. The batch size was set to 256, and we augmented the training data by a horizontal flip. While the diffusion timestep  $T$  was configured as 1,000 for all experiments, we trained for 100K iterations for the FFHQ dataset (Karras et al., 2019), and 400K iterations for the ImageNet dataset (Deng et al., 2009) and MS-COCO dataset (Lin et al., 2014). The number of clusters  $N$  was 20 unless otherwise specified. The maximum patience  $\tau$  was varied across model sizes: it was set at 200 for DiT-S/2, DiT-B/2, and EDM, and 400 for DiT-L/2. EDM was trained using fp16, while the other models were trained using fp32. We used 8 A100 GPUs for all experiments.

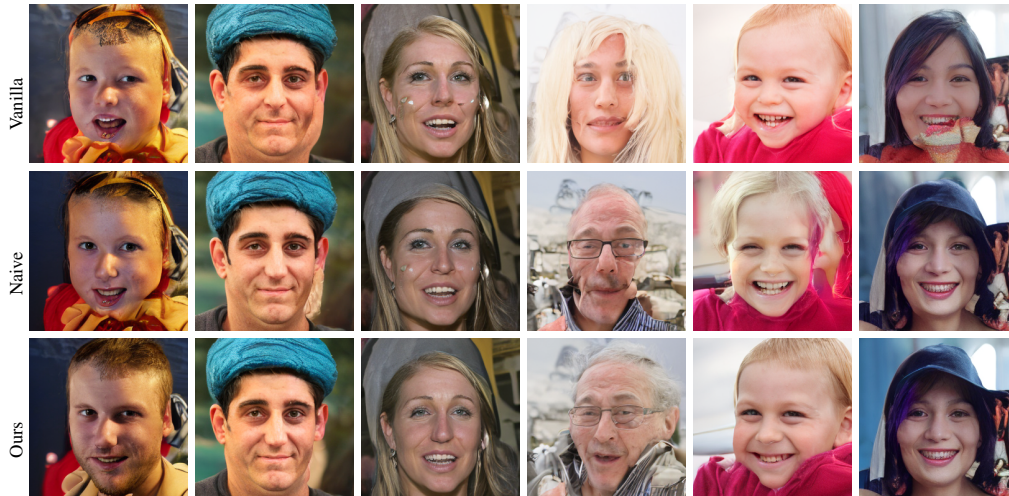

Figure C: Qualitative comparison between vanilla, naive curriculum, and ours on the FFHQ dataset.

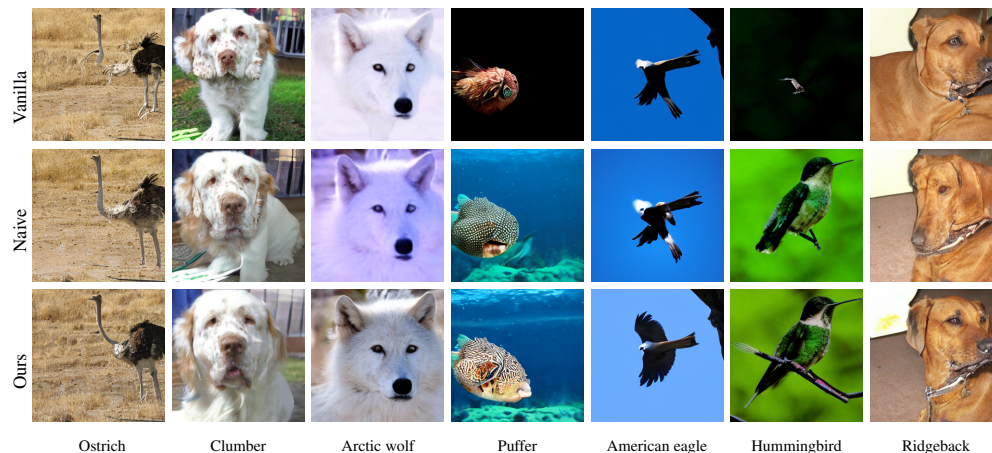

Figure D: Qualitative comparison between vanilla, naive curriculum, and ours on ImageNet dataset.

## F QUALITATIVE RESULTS

In this section, we present qualitative comparisons between three methods: 1) *Vanilla*, 2) *NaiveCL*, and 3) *Ours*, across the FFHQ, ImageNet, and MS-COCO datasets. All methods are evaluated using



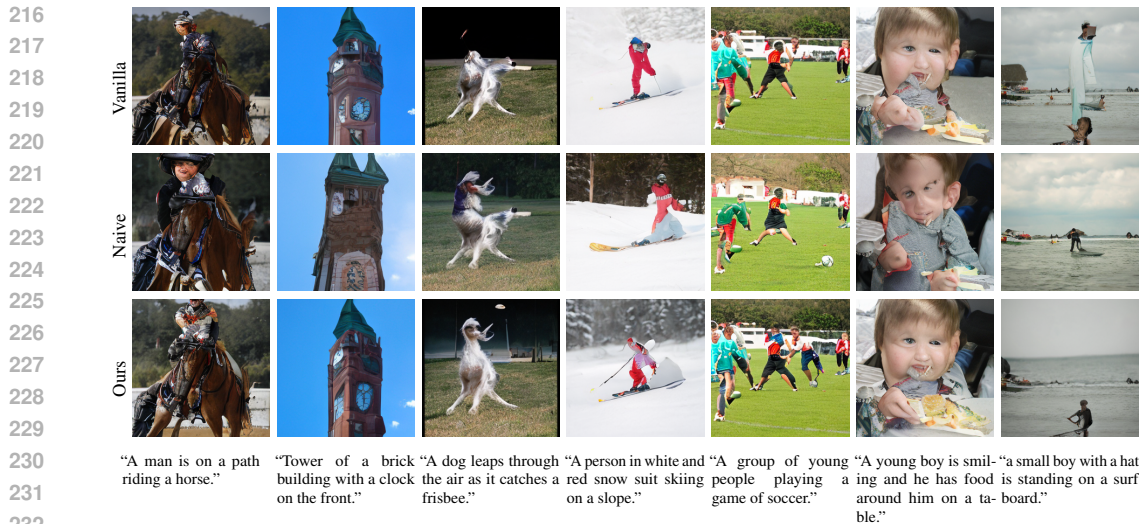

**Figure E:** Qualitative comparison between vanilla, naive curriculum, and ours on MS-COCO dataset. DiT-B models, and the final trained models generate all samples shown in the results. As shown in the results in the following subsections, our approach can synthesize more accurate and realistic images compared to *Vanilla* and *NaiveCL*.

### F.1 QUALITATIVE EVALUATION ON THE FFHQ DATASET.

Figure C presents a qualitative analysis of the performance in unconditional facial image synthesis among the vanilla, the naive curriculum approach, and our method. Our approach demonstrates superior ability in generating realistic images.

### F.2 QUALITATIVE ANALYSIS ON THE IMAGENET DATASET.

In the conditional image synthesis, we exhibit the outcomes generated by the vanilla, the naive curriculum strategy, and our proposed method. Figure D clearly shows that our methodology surpasses the competing approaches in terms of quality.

### F.3 QUALITATIVE ASSESSMENT ON THE MS-COCO DATASET.

To further substantiate the effectiveness of our proposed technique, we conduct a qualitative comparison of the results in the text-to-image generation task among the vanilla, the naive curriculum method, and our own approach, as depicted in Fig. E.

## G FURTHER EXPERIMENTAL RESULTS

### G.1 CONVERGENCE SPEED ACROSS MODEL SIZE

By leveraging the advantages of curriculum learning in diffusion training, our method offers faster convergence than vanilla training. To further investigate this aspect, we measured FID-10K through training iterations for DiT-S and DiT-L. Figure F describes the results, showing that our curriculum approach achieves faster convergence in both models. These results also support the effectiveness of our method.

### G.2 ROBUSTNESS ON NOISE SCHEDULE

For a more comprehensive ablation study, we also trained the diffusion model with different noise schedules. In contrast to cosine scheduling, the  $\beta_t$  is set by uniformly dividing the interval  $[0.0001, 0.02]$ , and the  $C_i$  are obtained corresponding to SNR on a linear schedule. As shown in Table. A, our approach improves the performance with cosine and linear noise schedulers.

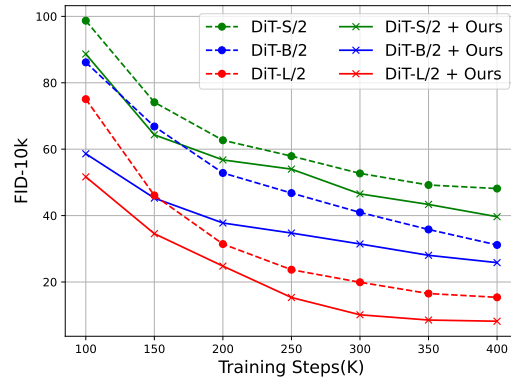

**Figure F:** We observed an increase in convergence speed across various model sizes when the proposed curriculum learning approach was applied.

**Table A:** Ablation study on noise scheduler. Note that our approach improves performance consistently across each scheduler.

| Class-Conditional ImageNet 256×256. |         |              |              |             |             |
|-------------------------------------|---------|--------------|--------------|-------------|-------------|
| Schedule                            | Method  | FID↓         | IS↑          | Prec↑       | Rec↑        |
| cosine                              | Vanilla | 30.27        | 60.06        | 0.55        | <b>0.52</b> |
|                                     | Ours    | <b>22.22</b> | <b>75.98</b> | <b>0.62</b> | <b>0.52</b> |
| linear                              | Vanilla | 16.99        | 83.62        | 0.68        | <b>0.53</b> |
|                                     | Ours    | <b>16.03</b> | <b>87.66</b> | <b>0.69</b> | <b>0.53</b> |

### G.3 QUALITATIVE RESULTS FROM DiT-L/2 WITH 2M ITERATIONS

In Figures G-K, we present images generated by DiT-L using our curriculum training method for 2M iterations. The results demonstrate that our method produces highly realistic images.

324  
325  
326  
327  
328  
329  
330  
331  
332  
333  
334  
335  
336  
337  
338  
339  
340  
341  
342  
343  
344  
345  
346  
347  
348  
349  
350  
351  
352  
353  
354  
355  
356  
357  
358  
359  
360  
361  
362  
363  
364  
365  
366  
367  
368  
369  
370  
371  
372  
373  
374  
375  
376  
377

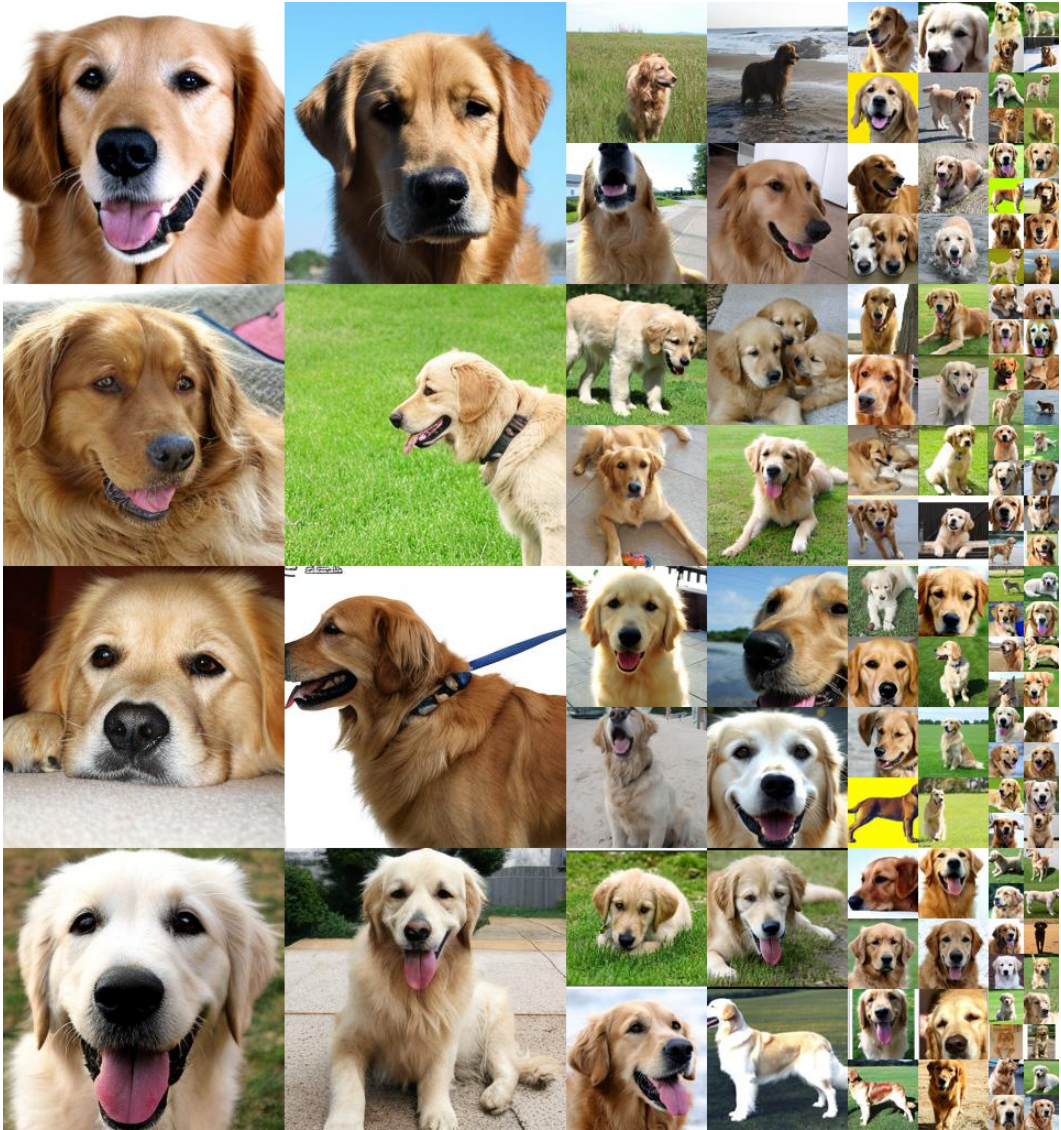

**Figure G:** Uncurated  $256 \times 256$  DiT-L/2 samples.  
Classifier-free guidance scale = 2.0.  
Class label = "golden retriever" (207)



378  
379  
380  
381  
382  
383  
384  
385  
386  
387  
388  
389  
390  
391  
392  
393  
394  
395  
396  
397  
398  
399  
400  
401  
402  
403  
404  
405  
406  
407  
408  
409  
410  
411  
412  
413  
414  
415  
416  
417  
418  
419  
420  
421  
422  
423  
424  
425  
426  
427  
428  
429  
430  
431

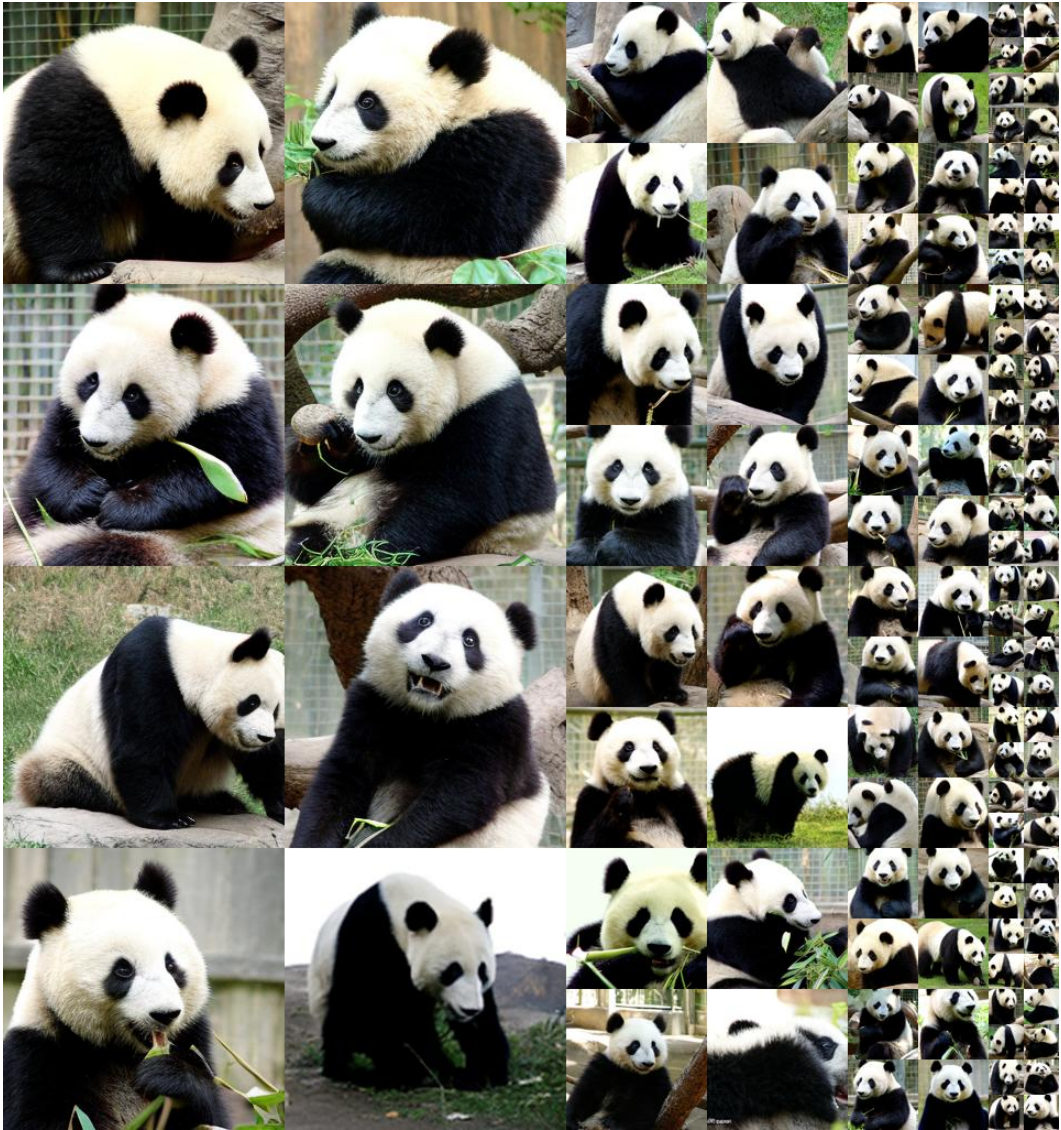

**Figure H:** Uncurated  $256 \times 256$  DiT-L/2 samples.  
Classifier-free guidance scale = 2.0.  
Class label = "panda" (388)



432  
433  
434  
435  
436  
437  
438  
439  
440  
441  
442  
443  
444  
445  
446  
447  
448  
449  
450  
451  
452  
453  
454  
455  
456  
457  
458  
459  
460  
461  
462  
463  
464  
465  
466  
467  
468  
469  
470  
471  
472  
473  
474  
475  
476  
477  
478  
479  
480  
481  
482  
483  
484  
485

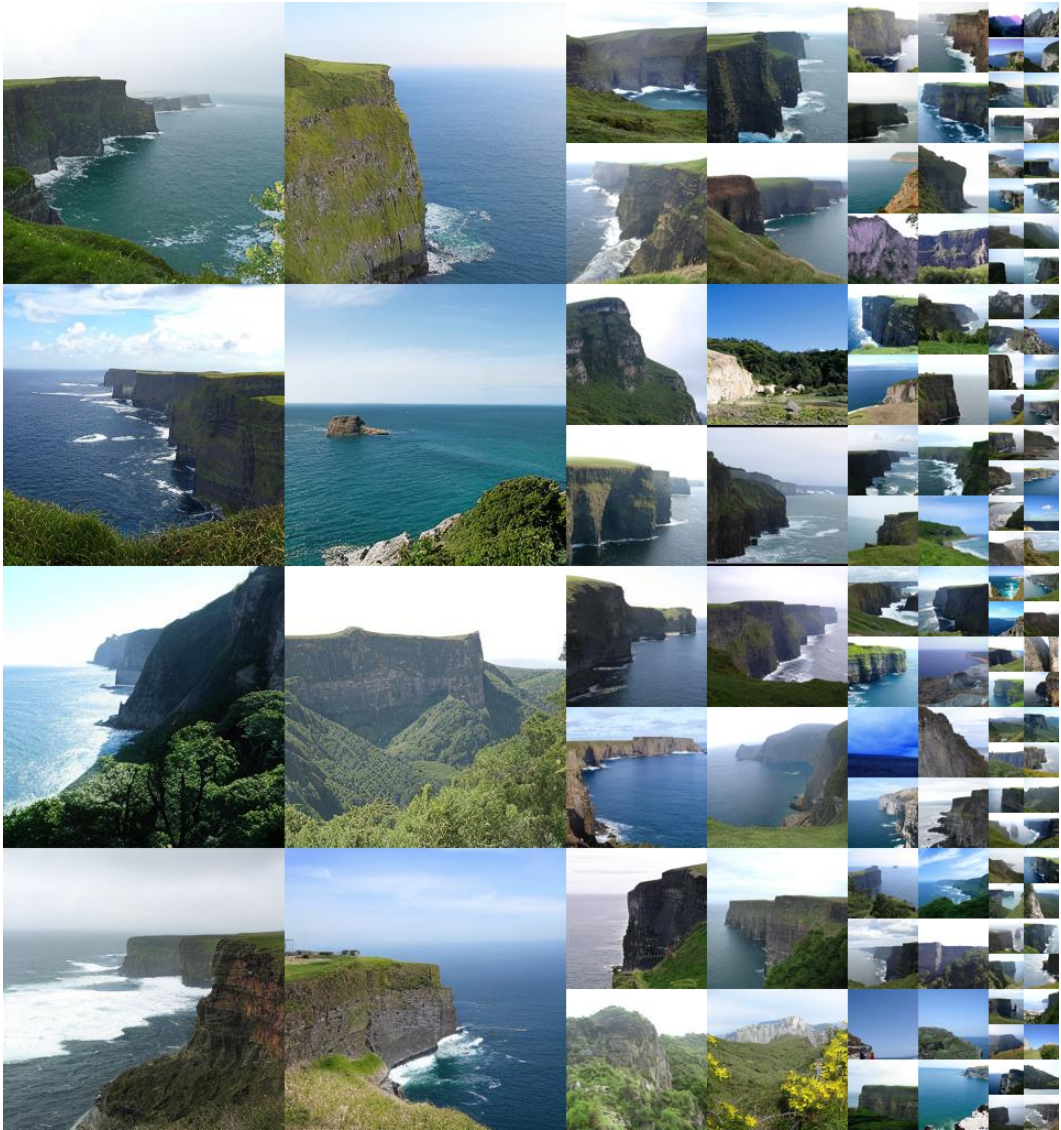

**Figure I:** Uncurated  $256 \times 256$  DiT-L/2 samples.  
Classifier-free guidance scale = 2.0.  
Class label = "cliff drop-off" (972)

486  
487  
488  
489  
490  
491  
492  
493  
494  
495  
496  
497  
498  
499  
500  
501  
502  
503  
504  
505  
506  
507  
508  
509  
510  
511  
512  
513  
514  
515  
516  
517  
518  
519  
520  
521  
522  
523  
524  
525  
526  
527  
528  
529  
530  
531  
532  
533  
534  
535  
536  
537  
538  
539

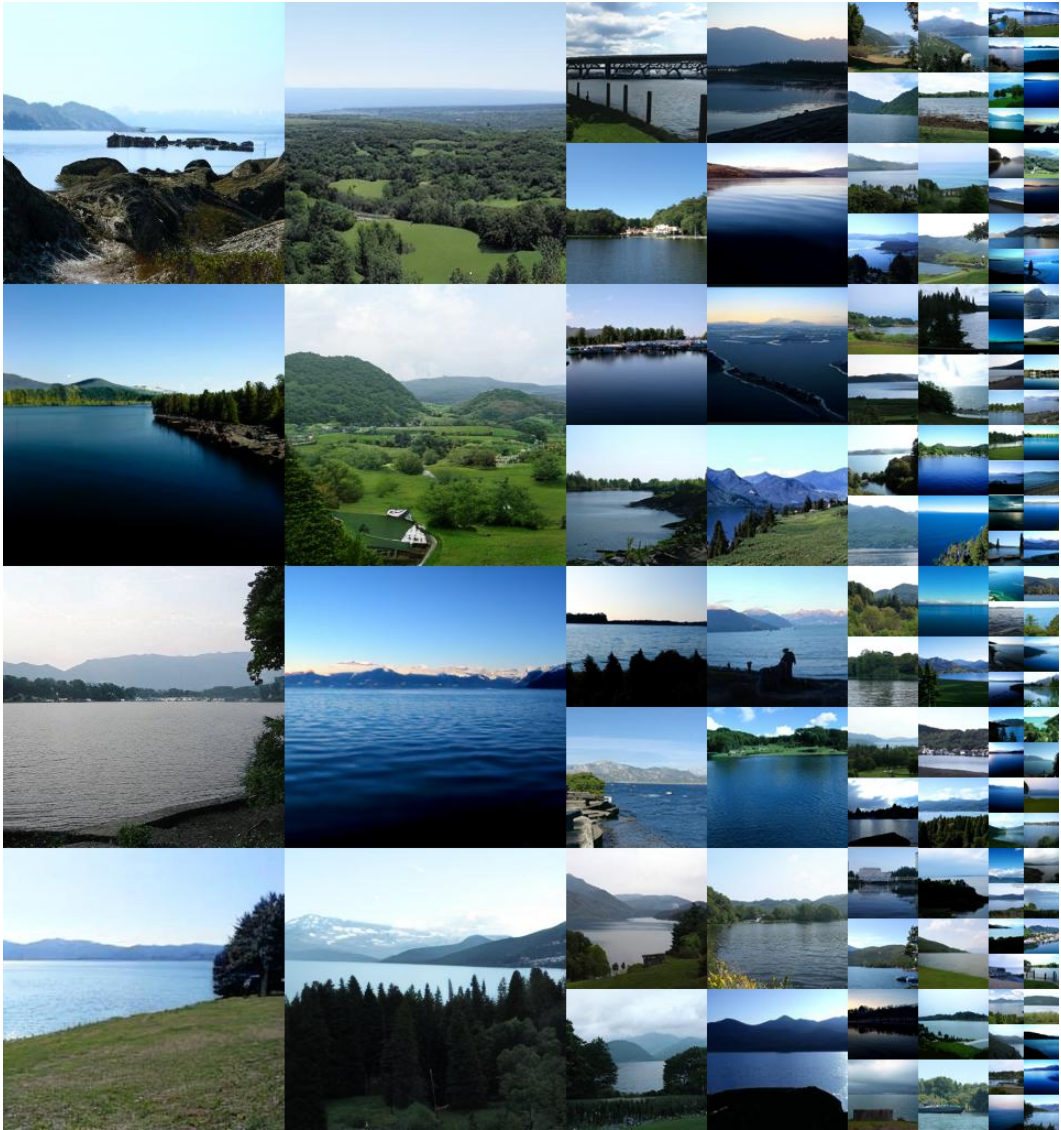

**Figure J:** Uncurated  $256 \times 256$  DiT-L/2 samples.  
Classifier-free guidance scale = 2.0.  
Class label = "lake shore" (975)



540  
541  
542  
543  
544  
545  
546  
547  
548  
549  
550  
551  
552  
553  
554  
555  
556  
557  
558  
559  
560  
561  
562  
563  
564  
565  
566  
567  
568  
569  
570  
571  
572  
573  
574  
575  
576  
577  
578  
579  
580  
581  
582  
583  
584  
585  
586  
587  
588  
589  
590  
591  
592  
593

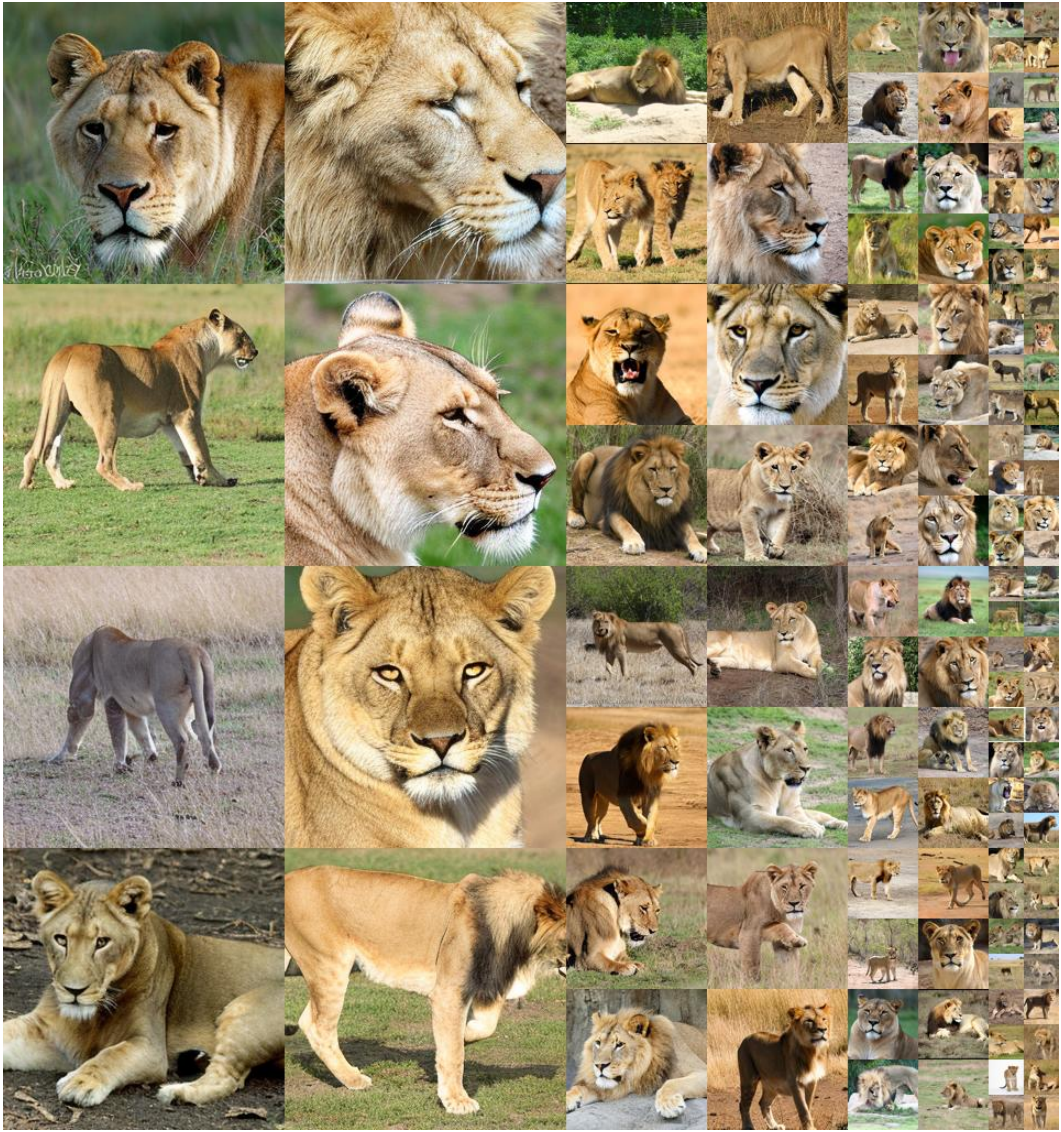

**Figure K:** Uncurated  $256 \times 256$  DiT-L/2 samples.  
Classifier-free guidance scale = 2.0.  
Class label = "lion" (291)



## H DISCUSSION ON SIMILARITY WITH THE PREVIOUS WORK

While both our work and (Go et al., 2023) explore the characteristics of denoising tasks in diffusion models, the aspects of exploration in each work are substantially different. The notion of task affinity introduced in (Fifty et al., 2021; Go et al., 2023) refers to how harmoniously the model can learn multiple tasks together. Specifically, their work focuses on identifying and mitigating conflicts between tasks, emphasizing task interactions and transferability by analyzing task similarities (e.g., gradient similarity or alignment). In contrast, our work explicitly quantifies the relative difficulty of individual denoising tasks across timesteps as a standalone property, independent of task interdependencies. The analysis of task difficulty in our work involves evaluating metrics such as loss behavior or convergence rates, directly reflecting the complexity of solving each task at different timesteps. Therefore, while (Go et al., 2023) addresses how tasks relate and interact during multi-task learning, our focus lies in systematically characterizing the intrinsic difficulty of tasks across timesteps in diffusion models.

## I BROADER IMPACTS

Generative models, such as diffusion models, have the potential to significantly impact society, particularly through DeepFake applications and the use of biased datasets. One primary concern is the possibility for these models to amplify misinformation, which can erode trust in visual media. Additionally, if these models are trained on biased or deliberately altered content, they may unintentionally perpetuate and intensify existing social biases. This situation may result in the dissemination of incorrect information and the manipulation of public opinion.

## J LIMITATIONS

In this work, we demonstrated the varying difficulties of denoising tasks through empirical results on various diffusion frameworks and proposed a curriculum learning approach that effectively enhances diffusion model training. While we have shown the robustness of our method’s hyperparameters in improving vanilla diffusion training, there is potential for further improvement. Specifically, curriculum learning methods that utilize smaller hyperparameters and adjust dynamically based on the model itself could yield better results. We acknowledge the validity of this direction and consider it a promising avenue for future work.

## REFERENCES

- Kamil Deja, Anna Kuzina, Tomasz Trzcinski, and Jakub Tomczak. On analyzing generative and denoising capabilities of diffusion-based deep generative models. *Advances in Neural Information Processing Systems*, 35:26218–26229, 2022. 1
- Jia Deng, Wei Dong, Richard Socher, Li-Jia Li, Kai Li, and Li Fei-Fei. Imagenet: A large-scale hierarchical image database. In *2009 IEEE conference on computer vision and pattern recognition*, pp. 248–255. Ieee, 2009. 4
- Chris Fifty, Ehsan Amid, Zhe Zhao, Tianhe Yu, Rohan Anil, and Chelsea Finn. Efficiently identifying task groupings for multi-task learning. *Advances in Neural Information Processing Systems*, 34: 27503–27516, 2021. 12
- Paul Glasserman. *Monte Carlo methods in financial engineering*, volume 53. Springer, 2004. 3
- Hyojun Go, JinYoung Kim, Yunsung Lee, Seunghyun Lee, Shinhyeok Oh, Hyeongdon Moon, and Seungtaek Choi. Addressing negative transfer in diffusion models. *arXiv preprint arXiv:2306.00354*, 2023. 1, 2, 12
- Martin Heusel, Hubert Ramsauer, Thomas Unterthiner, Bernhard Nessler, and Sepp Hochreiter. Gans trained by a two time-scale update rule converge to a local nash equilibrium. *Advances in neural information processing systems*, 30, 2017. 3

- 648 Jonathan Ho and Tim Salimans. Classifier-free diffusion guidance. *arXiv preprint arXiv:2207.12598*,  
649 2022. 4
- 650
- 651 Jonathan Ho, Chitwan Saharia, William Chan, David J Fleet, Mohammad Norouzi, and Tim Salimans.  
652 Cascaded diffusion models for high fidelity image generation. *Journal of Machine Learning*  
653 *Research*, 23(47):1–33, 2022. 1
- 654 Tero Karras, Samuli Laine, and Timo Aila. A style-based generator architecture for generative  
655 adversarial networks. In *Proceedings of the IEEE/CVF conference on computer vision and pattern*  
656 *recognition*, pp. 4401–4410, 2019. 4
- 657
- 658 Tero Karras, Miika Aittala, Tuomas Kynkäänniemi, Jaakko Lehtinen, Timo Aila, and Samuli Laine.  
659 Guiding a diffusion model with a bad version of itself. *arXiv preprint arXiv:2406.02507*, 2024. 3
- 660 Tuomas Kynkäänniemi, Tero Karras, Samuli Laine, Jaakko Lehtinen, and Timo Aila. Improved  
661 precision and recall metric for assessing generative models. *Advances in Neural Information*  
662 *Processing Systems*, 32, 2019. 3
- 663
- 664 Yunsung Lee, Jin-Young Kim, Hyojun Go, Myeongho Jeong, Shinhyeok Oh, and Seungtaek Choi.  
665 Multi-architecture multi-expert diffusion models. *arXiv preprint arXiv:2306.04990*, 2023. 1
- 666 Tsung-Yi Lin, Michael Maire, Serge Belongie, James Hays, Pietro Perona, Deva Ramanan, Piotr  
667 Dollár, and C Lawrence Zitnick. Microsoft coco: Common objects in context. In *Computer Vision–*  
668 *ECCV 2014: 13th European Conference, Zurich, Switzerland, September 6–12, 2014, Proceedings,*  
669 *Part V 13*, pp. 740–755. Springer, 2014. 4
- 670 Ilya Loshchilov and Frank Hutter. Decoupled weight decay regularization. *arXiv preprint*  
671 *arXiv:1711.05101*, 2017. 4
- 672
- 673 Don McLeish. A general method for debiasing a monte carlo estimator. *Monte Carlo methods and*  
674 *applications*, 17(4):301–315, 2011. 3
- 675
- 676 Zizheng Pan, Bohan Zhuang, De-An Huang, Weili Nie, Zhiding Yu, Chaowei Xiao, Jianfei Cai,  
677 and Anima Anandkumar. T-stitch: Accelerating sampling in pre-trained diffusion models with  
678 trajectory stitching. 2023. 1
- 679 Daniel Ruderman and William Bialek. Statistics of natural images: Scaling in the woods. *Advances*  
680 *in neural information processing systems*, 6, 1993. 3
- 681 Tim Salimans and Jonathan Ho. Progressive distillation for fast sampling of diffusion models. *arXiv*  
682 *preprint arXiv:2202.00512*, 2022. 1
- 683
- 684 Tim Salimans, Ian Goodfellow, Wojciech Zaremba, Vicki Cheung, Alec Radford, and Xi Chen.  
685 Improved techniques for training gans. *Advances in neural information processing systems*, 29,  
686 2016. 3
- 687 Yilun Xu, Shangyuan Tong, and Tommi Jaakkola. Stable target field for reduced variance score  
688 estimation in diffusion models. *arXiv preprint arXiv:2302.00670*, 2023. 1
- 689
- 690
- 691
- 692
- 693
- 694
- 695
- 696
- 697
- 698
- 699
- 700
- 701
